# Supplementary material
Source: PubMed Central journal article supplement (PMC5827450)
Supplement: supp_RA117.000152_132673_1_supp_37348_p08ppv.pdf [file supp_RA117.000152_132673_1_supp_37348_p08ppv.pdf]

# **The NLR family pyrin domain containing 11 protein contributes to the regulation of inflammatory signalling**

Kornelia Ellwanger<sup>1</sup> Emily Becker, Ioannis Kienes, Anna Sowa, Yvonne Postma, Yamel Cardona Gloria, Alexander N. R. Weber, Thomas A. Kufer

From the Institute of Nutritional Medicine, Department of Immunology, University of Hohenheim, 70593 Stuttgart, Germany; Department of Immunology, University of Tübingen, 72076 Tübingen, Germany.

## **Supplemental Figures 1-3**

**A**

NLRP11 Gene Expression

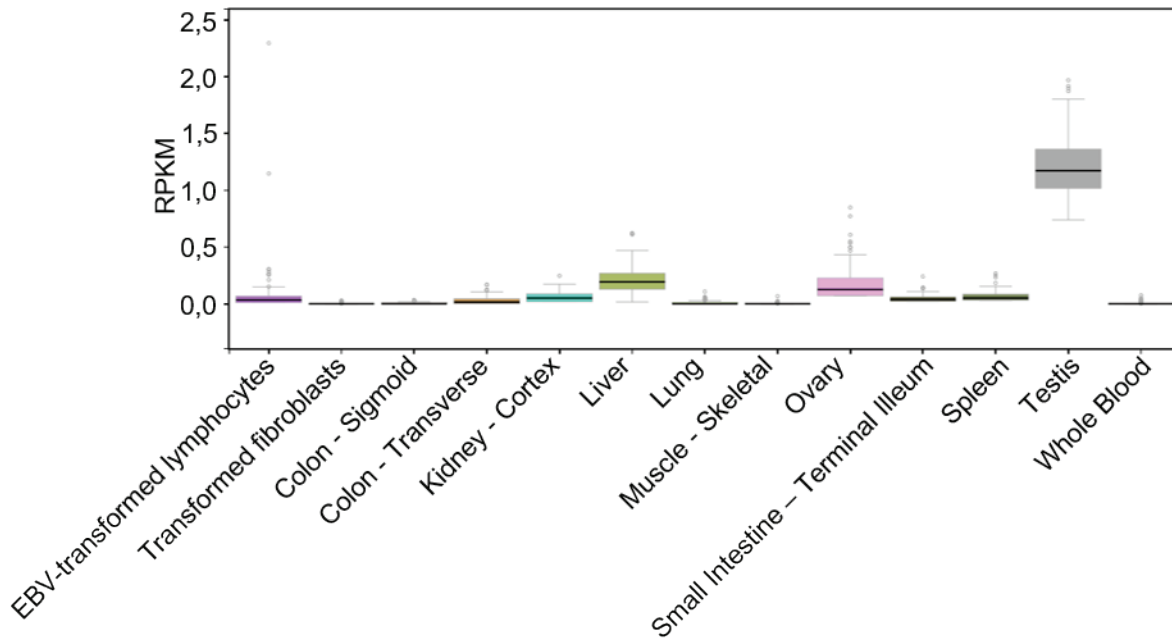

**B**

NLRP11 - Entrez ID: 204801

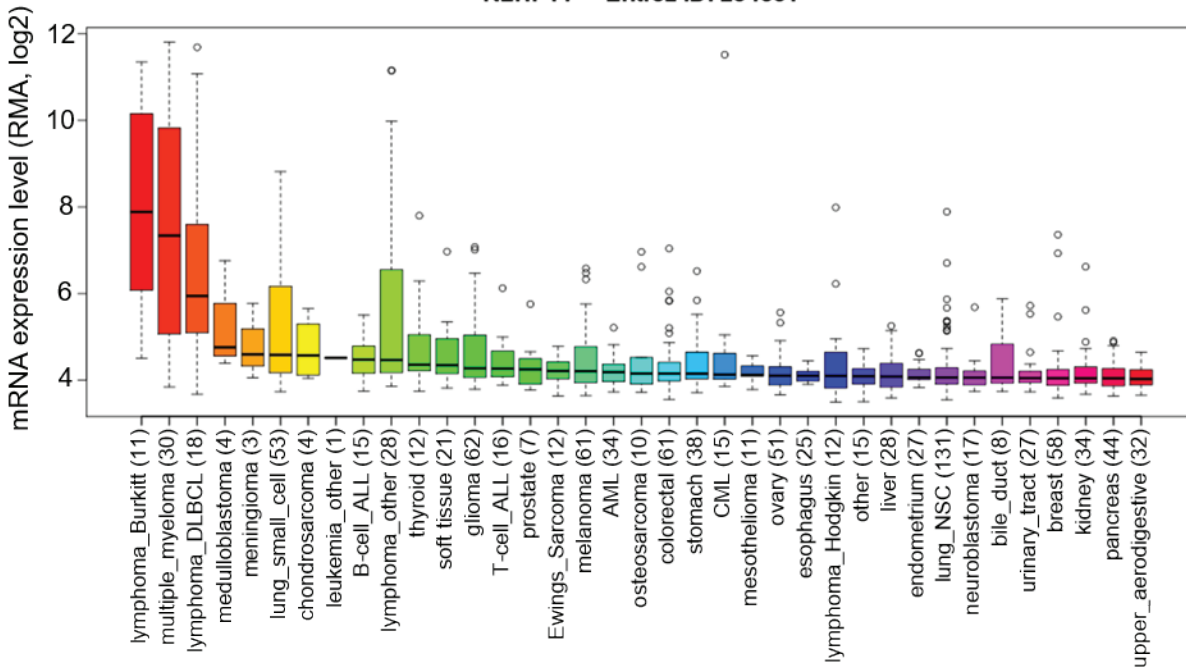

**Supplemental Figure 1. Expression pattern of NLRP11.**

A, NLRP11 expression values in RPKM (Reads Per Kilobase of transcript per Million mapped reads) in human tissues found in Gtex Portal database. Box plots as median with 25th and 75th percentiles (right).  
 B, Gene-centric RMA-normalized mRNA expression data of NLRP11 in different cancer tissue cells listed in CCLE database. Box plots as median with 25th and 75th percentiles (right).

<https://www.broadinstitute.org/ccle/>

# Supplemental Figure 2, Ellwanger et al.

## A

Dataset: 35 perturbations from data selection: HS\_AFFY\_U133PLUS\_2-0  
 Showing 1 measure(s) of 1 gene(s) on selection: HS-0

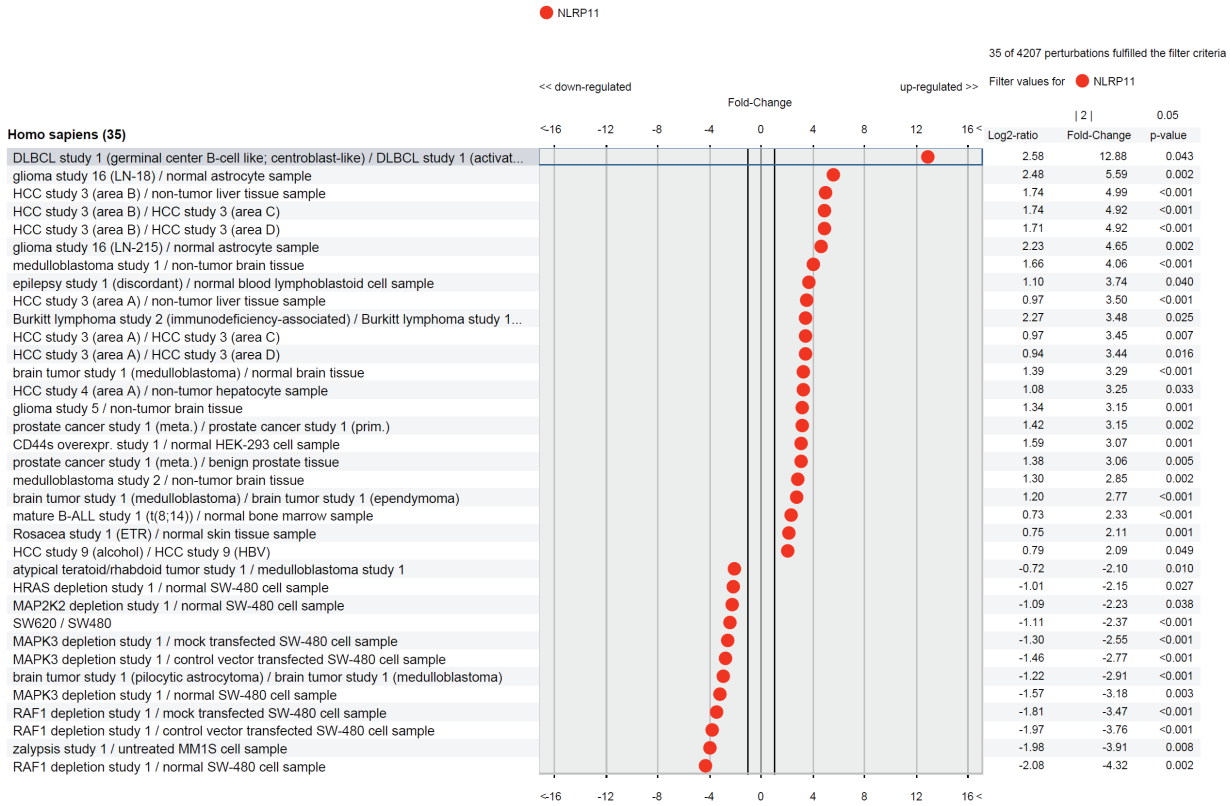

## B

Dataset: 2414 anat./neopl./cell. categories from data selection: HS\_AFFY\_U133PLUS\_2-0  
 Lead Gene: NLRP11 from selection: HS-0

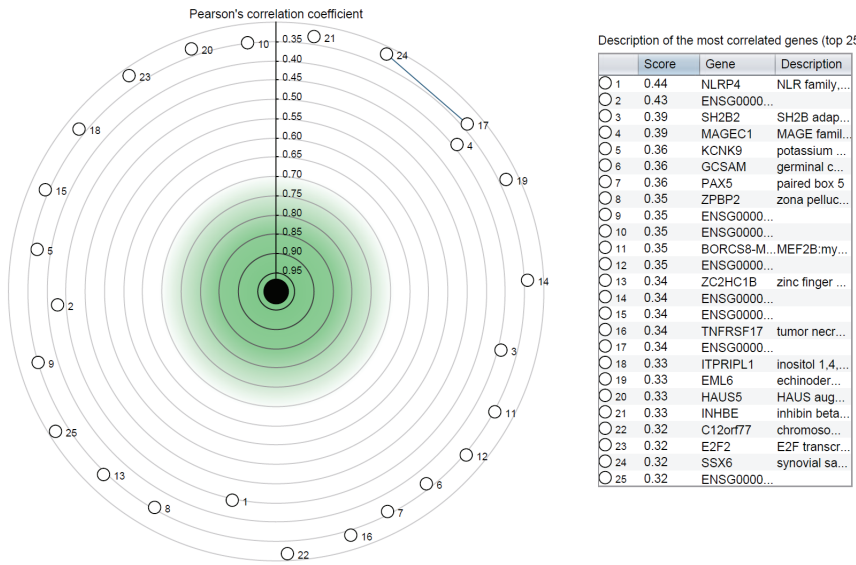

Show only genes with correlation above: 0.317

Connect genes with mutual correlation at least: 0.825

## Supplemental Figure 2. NLRP11 expression in cancer tissue and co-expression with NLRP4.

A, Comparison of differences in NLRP11 expression in 35 datasets. The most prominent perturbations are listed.

B, Analysis of 2414 gen-chip experiments and calculation of co-expression of genes relative to NLRP11.

Analysis was conducted using the Genevestigator software package.

**A**

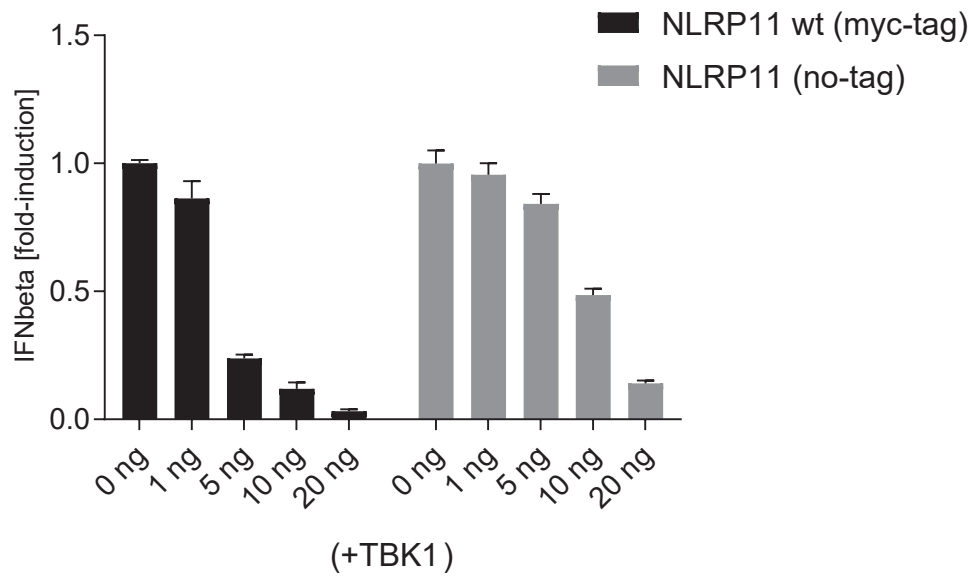

**B**

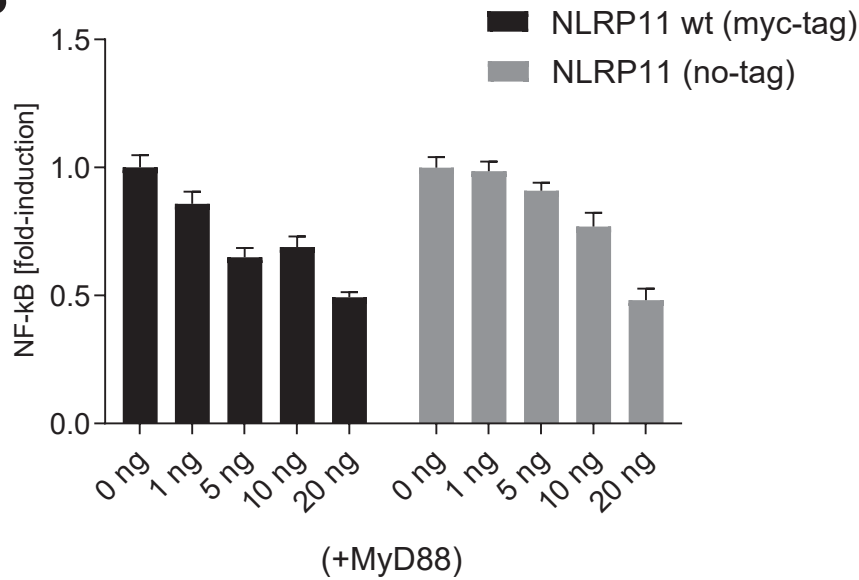

**Supplemental Figure 3. Effect of the N-terminal myc-tag on NLRP11 function.**

Comparison of the effect of expression of myc-tagged and un-tagged NLRP11 on TBK1 induced IFN $\beta$  reporter activation (A) and MyD88-induced NF- $\kappa$ B activation in HEK293T luciferase gene-reporter assays. Fold induction + S.D. normalized to control (0 ng NLRP11) of two independent experiments conducted in triplicates is shown. Releates to Figure 4.
